# Supplementary material for: Functional interdependence of the actin nucleator Cobl and Cobl-like in dendritic arbor development
Source: eLife. 2021 Jul 15;10:e67718. doi: 10.7554/eLife.67718 (PMC8282341; doi:10.7554/eLife.67718)
Supplement: Figure 1—figure supplement 2—source data 1. [file elife-67718-fig1-figsupp2-data1.xlsx]

## Sheet: Figure1-Fig.Suppl.2-source data
	Figure1-Figure Supplement 2E				Figure1-Figure Supplement 2F				Figure1-Figure Supplement 2G
	Scr. RNAi	Cobl RNAi	Cobl-like RNAi		Scr. RNAi	Cobl RNAi	Cobl-like RNAi		Scr. RNAi	Cobl RNAi	Cobl-like RNAi
	9	5	5		17	18	13		638.63	578.234	513.159
	12	10	5		21	16	12		623.94	396.049	367.596
	11	8	7		24	17	10		753.466	524	304.878
	5	5	3		12	17	9		319.842	449.536	300.962
	11	6	6		21	20	12		618.801	553.704	301.371
	4	9	6		16	16	14		492.201	580.24	459.04
	14	8	6		23	16	13		618.228	627.274	378.51
	12	5	6		20	19	15		998.751	486.475	480.631
	16	5	11		26	15	17		899.93	432.437	569.595
	7	9	8		17	25	20		428.785	1052.35	577.91
	10	18	12		22	25	26		591.855	943.456	644.188
	5	13	2		14	20	9		533.352	746.089	300.268
	7	6	10		15	19	20		457.148	751.971	472.129
	10	4	4		21	11	14		629.486	524.342	370.922
	14	3	8		22	13	15		638.49	515.412	703.061
	5	8	5		15	19	16		625.505	707.47	535.44
	10	6	8		18	12	20		496.026	360.669	693.08
	7	1	10		21	12	16		514.815	409.01	556.984
	12	4	10		29	17	15		951.741	448.178	533.326
	13	11	3		21	17	14		695.309	647.449	391.948
	9	5	9		17	15	14		559.4	578.772	502.984
	4	7	6		13	18	9		395.744	442.57	253.519
	16	7	5		26	20	12		772.009	758.263	518.065
	9	6	5		15	25	10		401.787	764.337	297.63
	14	2	3		28	6	10		902.453	398.866	328.149
	12	9	10		19	19	17		497.5	464.867	545.218
	10	11	3		22	19	6		578.534	674.991	263.105
	12	4	2		23	11	8		663.674	354.191	333.897
	8	5	5		17	15	10		617.941	526.445	298.929
	9	8	2		19	14	8		663.255	499.374	463.301
	13	2	7		24	10	16		659.022	470.162	378.408
	12				22				715.787
	14				21				614.086
Mean	10.1818	6.77419	6.19355		20.0303	16.6452	13.5484		623.257	569.909	439.942
SD	3.35833	3.50913	2.83336		4.22407	4.35544	4.35001		157.696	166.494	128.915
n	33	31	31		33	31	31		33	31	31
SEM	0.584611	0.630258	0.508887		0.735317	0.782261	0.781285		27.4514	29.9032	23.1538
