# Supplementary material for: Functional interdependence of the actin nucleator Cobl and Cobl-like in dendritic arbor development
Source: eLife. 2021 Jul 15;10:e67718. doi: 10.7554/eLife.67718 (PMC8282341; doi:10.7554/eLife.67718)
Supplement: Figure 1—figure supplement 2—source data 2. [file elife-67718-fig1-figsupp2-data2.xlsx]

## Sheet: Figure1-Fig.Suppl.2-source data
		Figure1-Figure Supplement 2H
	Sholl intersections	Scr. RNAi1			Cobl RNAi			Cobllike RNAi
		Mean	SEM	n	Mean	SEM	n	Mean	SEM	n
	10	11.18	0.46	33	10.48	0.65	31	7.84	0.57	31
	15	14.52	0.53	33	12.42	0.72	31	10.26	0.58	31
	20	15.52	0.66	33	13.1	0.68	31	10.97	0.61	31
	25	13.42	0.68	33	11.48	0.68	31	9.39	0.54	31
	30	10.48	0.66	33	9.45	0.73	31	6.9	0.49	31
	35	7.91	0.63	33	7.42	0.77	31	5.03	0.42	31
	40	5.48	0.62	33	5.39	0.69	31	3.61	0.4	31
	45	3.76	0.49	33	4.03	0.57	31	2.65	0.31	31
	50	2.58	0.39	33	3.29	0.47	31	2.13	0.31	31
	55	2	0.48	33	2.29	0.36	31	1.58	0.26	31
	60	1.36	0.31	33	1.55	0.3	31	1.19	0.22	31
