# Supplementary material for: Functional interdependence of the actin nucleator Cobl and Cobl-like in dendritic arbor development
Source: eLife. 2021 Jul 15;10:e67718. doi: 10.7554/eLife.67718 (PMC8282341; doi:10.7554/eLife.67718)
Supplement: Figure 1—source data 1. [file elife-67718-fig1-data1.xlsx]

## Sheet: Figure 1-source data 1
	Figure 1G					Figure 1H					Figure 1I
	GFP+Scr. RNAi	GFP-Cobl-like + Scr. RNAi	GFP-Cobl-like + Cobl RNAi	GFP + Cobl RNAi		GFP+Scr. RNAi	GFP-Cobl-like + Scr. RNAi	GFP-Cobl-like + Cobl RNAi	GFP + Cobl RNAi		GFP+Scr. RNAi	GFP-Cobl-like + Scr. RNAi	GFP-Cobl-like + Cobl RNAi	GFP + Cobl RNAi
	11	16	4	10		23	25	15	29		776.09	674.54	614.34	1102.85
	5	15	9	9		22	27	18	21		699.01	949.07	532.95	834.57
	7	9	16	10		18	22	25	21		666.98	791.26	948.6	760.82
	12	20	3	7		24	32	16	19		759.93	1037.73	511.2	457.46
	7	12	4	8		16	23	15	16		665.47	738.09	539.27	673.92
	3	14	5	8		10	24	15	17		386.04	1051.81	604.89	755.69
	12	13	15	2		24	27	23	17		1030.57	891.52	881.98	558.87
	9	11	6	8		20	29	24	16		694.35	1192.24	893.4	526.38
	9	11	10	10		19	20	22	21		738.96	740.05	729.35	836.34
	8	11	6	6		18	19	18	20		804.44	634.24	706.85	602.54
	10	18	10	7		20	34	20	19		893.36	1350.21	757.12	738.24
	7	8	6	10		17	18	24	29		523.3	617.22	813.97	926.77
	11	11	4	6		25	23	23	14		839.04	775.97	810.37	653.73
	10	12	8	3		18	23	19	15		654.2	874.92	560.83	582.3
	7	10	8	11		16	25	20	25		862.37	1188.32	511.77	770.1
	10	15	5	2		20	23	18	13		619.32	999.73	894.69	511
	12	11	7	6		24	23	17	12		585.41	860.03	613.98	434.12
	8	11	5	3		27	24	12	19		989.21	844.93	527.34	866.48
	8	16	8	14		17	30	13	24		481.35	1672.63	747.55	1082.33
	6	20	8	4		20	30	18	15		419.4	1359.93	766.22	666.88
	6	21	3	6		16	29	12	21		412.18	1084.14	573.53	822.57
	4	13	2	12		14	30	10	23		418.03	1145.2	521.27	1275.24
	11	7	14	9		21	21	27	19		625.49	1198	1036.37	826.45
	4	15	13	11		21	25	24	23		997.75	1267.42	702.12	936.09
	11	15	5	8		31	29	17	19		650.88	741.03	767.29	673.24
	8	17	6	5		15	24	14	15		613.51	856.89	486.83	524.22
	4	12	8	2		20	26	17	13		497.61	814.56	892.29	435.37
	8	8	3	4		19	18	13	17		933.77	490.13	507.17	721.42
	13	14	7	5		26	25	21	15		567.02	827.67	797.74	507.59
	14	10	6	13		22	21	15	29		567.91	769.59	595.04	1179.99
	9	7	7	7		23	18	20	20		1037.66	630.55	624.15	766.11
	8	13	8	8		16	20	16	20		847.69	623.92	765.45	894.15
	16	15				28	27				1039.19	853.01
	7	19				19	33				715.67	1098.66
	6	16				12	32				702.24	744.77
	2	12				12	21				684.45	556.4
	5					10					1029.84
	9					17					1022.2
	19					32					1269.62
	9					24					747.28
	11					22					959.68
	5					15					724.46
	13					25					908.03
	5					15					1023.49
	11					19					932.1
Mean	8.66667	13.2778	7.15625	7.3125		19.8222	25	18.1562	19.25		755.923	915.177	694.873	746.995
SD	3.4772	3.66147	3.49294	3.23726		5.01039	4.44651	4.30386	4.57905		207.537	261.135	152.292	215.422
n	45	36	32	32		45	36	32	32		45	36	32	32
SEM	0.51835	0.610245	0.61747	0.572272		0.746905	0.741085	0.760822	0.80947		30.9379	43.5225	26.9216	38.0816
