# Supplementary material for: Functional interdependence of the actin nucleator Cobl and Cobl-like in dendritic arbor development
Source: eLife. 2021 Jul 15;10:e67718. doi: 10.7554/eLife.67718 (PMC8282341; doi:10.7554/eLife.67718)
Supplement: Figure 1—source data 2. [file elife-67718-fig1-data2.xlsx]

## Sheet: Figure 1-source data 2
	Figure 1N					Figure 1O					Figure 1P
	GFP+Scr. RNAi	Cobl+Scr. RNAi	Cobl+Cobl-like RNAi	GFP+Cobl-like RNAi		GFP+Scr. RNAi	Cobl+Scr. RNAi	Cobl+Cobl-like RNAi	GFP+Cobl-like RNAi		GFP+Scr. RNAi	Cobl+Scr. RNAi	Cobl+Cobl-like RNAi	GFP+Cobl-like RNAi
	14	20	4	3		23	34	13	11		910.87	912.58	394.3	453.41
	9	14	3	1		12	26	10	9		651.9	560.42	498.52	255.53
	5	12	9	7		11	23	18	20		576.13	615.06	528.46	687.07
	9	13	4	13		13	25	10	22		676.24	836.06	369.13	866.16
	18	16	14	3		21	24	24	8		880.68	655.77	558.32	329.89
	5	18	9	7		24	28	14	20		468.66	811.61	473.47	436.78
	11	16	10	13		28	26	19	20		528.84	740.51	454.42	782.56
	12	14	8	6		17	28	21	16		604.08	732	606.66	570
	9	21	6	1		12	33	16	8		531.97	697.76	556.5	277.66
	12	13	13	6		16	23	24	17		636.08	674.4	693.43	727.88
	7	14	5	10		14	25	12	15		519.89	747.46	260.39	605.65
	10	11	14	7		20	23	21	19		602.19	717.16	602.64	521.15
	13	9	3	9		16	28	12	23		810.8	724.67	512.48	819.95
	4	12	9	3		28	26	20	18		345.84	830.77	790.76	513.24
	5	16	8	6		19	23	19	13		529.46	960.84	721.46	394.06
	4	14	18	3		12	24	27	16		399.48	705.6	906.21	632.77
	13	10	2	10		12	16	16	19		615.12	610.37	544.15	743.29
	16	8	5	9		10	18	14	22		734.59	911.13	452.98	858.8
	20	10	3	2		17	20	10	10		903.94	1116.32	472.57	363.8
	8	19	9	7		32	32	19	20		623.11	1042.34	546.65	765.77
	7	8	11	9		24	21	19	23		535.22	922.16	665.95	819.91
	8	6	7	7		22	15	16	18		572.4	525.13	568.26	620.44
	6	17	11	5		15	26	17	17		580.01	1136.02	613.56	520.73
	9	9	6	8		15	18	12	17		655.78	819.7	718.65	547.74
	8			10		15			15		585.41			452.33
	16			7		19			16		989.21			619.76
	7			3		27			9		481.35			243.61
	6			4		17			15		419.4			381.45
	2			7		26			17		412.18			496.86
	5			4		22			12		418.03			411.41
	9			6		14			13		625.49			482.97
	19			10		20			15		997.75			526.95
	9			6		22			15		650.88			525.8
	11			3		18			11		613.51			310.06
	5			12		24			22		497.61			678.32
	5			7		20			16		567.02			400.09
	5			7		22			12		567.02			416.02
	11			10		19			17		567.91			585.91
	10			11		22			29		707.05			685.96
	11			5		23			11		495.39			269.19
	13			4		17			10		719.8			244.88
	9			7		25			12		816.27			375.87
	6			6		16			16		359.69			479.35
	9			4		12			14		593.77			391.19
	10			2		22			7		616.32			193.04
	11			7		21			14		634.23			383.99
	12			4		16			9		829.05			363.73
	13			4		15			14		564.74			413.42
	11			7		10			18		989.16			427.8
	8			12		21			27		658.13			664.71
	12					19					698.06
	15					15					740.62
	7					20					453.23
	8					25					932.05
	4					19					533.34
	6					14					420.4
	8					20					687.67
	9					25					768.29
	6					13					468.91
	8					16					531.61
	4					20					472.01
	13					18					846.86
	6					20					630.4
	7					13					453.18
	11					17					600.81
Mean	9.21538	13.3333	7.95833	6.48		18.6462	24.375	16.7917	15.74		623.186	791.91	562.913	510.778
SD	3.84664	4.02888	4.13342	3.09206		4.88118	4.90619	4.72716	4.90235		158.465	164.347	141.263	176.638
n	65	24	24	50		65	24	24	50		65	24	24	50
SEM	0.477117	0.822392	0.84373	0.437283		0.605436	1.00147	0.964927	0.693297		19.6552	33.5472	28.8352	24.9804
