# Supplementary material for: Functional interdependence of the actin nucleator Cobl and Cobl-like in dendritic arbor development
Source: eLife. 2021 Jul 15;10:e67718. doi: 10.7554/eLife.67718 (PMC8282341; doi:10.7554/eLife.67718)
Supplement: Figure 3—source data 1. [file elife-67718-fig3-data1.xlsx]

## Sheet: Figure 3-source data 1
	Figure 3D				Figure 3E				Figure 3F
	GFP+Scr. RNAi	GFP-Cobl-like + Scr. RNAi	GFP-Cobl-like + SdpI RNAi		GFP+Scr. RNAi	GFP-Cobl-like + Scr. RNAi	GFP-Cobl-like + SdpI RNAi		GFP+Scr. RNAi	GFP-Cobl-like + Scr. RNAi	GFP-Cobl-like + SdpI RNAi
	13	11	7		19	26	15		575.34	762.11	364.21
	8	12	9		14	22	19		386.98	630.82	415.7
	15	18	12		25	28	20		635.93	624.01	485.26
	8	11	12		15	26	19		322.98	762.11	748.9
	8	13	6		17	24	18		500.26	630.38	440.83
	16	11	10		24	26	18		579.08	762.11	471.32
	7	13	11		17	26	16		645.29	628.78	498.9
	15	8	15		23	22	25		596.93	569.46	668.65
	5	6	5		12	18	12		399.94	560.93	232.94
	5	15	11		13	33	21		441.72	848.37	625.52
	10	16	9		22	28	16		554.24	1031.64	575.74
	6	9	6		19	18	17		480.28	495.02	414.2
	10	15	7		24	24	14		604.96	848.01	329.58
	9	13	7		16	28	14		456.26	725.96	329.58
	10	17	5		22	30	12		650.9	805.26	435.09
	8	13	2		13	24	15		350.43	480.38	367.64
	17	15	11		28	26	25		783.98	595.57	559.6
	13	14	11		23	24	17		483.77	674.41	607.52
	9	16	10		19	29	22		367.22	896.72	532.94
	11	12	11		19	26	26		452.81	825.95	912.13
	13	7	15		23	21	33		637.76	700.13	775.97
	7	14	11		14	29	24		340.03	605.72	735.41
	6	23	14		16	32	24		358.72	850.82	459.73
	4	13	16		15	24	20		405.29	548.49	433.55
	12	18	10		23	31	20		767.78	582.27	351.06
	17	20	9		28	31	15		673.39	792.53	545.76
	9	17	12		19	26	19		578.04	420.81	639.59
	7	11	18		20	26	27		616.05	673.33	534.08
	6	18	17		13	33	27		366.73	929.5	461.35
	10	17	13		22	28	23		650.9	623.79	481.74
	15	16	16		31	31	30		1312.88	942.35	559.91
	14	9	8		24	20	27		1073.68	729.44	981.57
			6				23				979.81
Mean	10.0938	13.7812	10.3636		19.75	26.25	20.3939		564.08	704.912	544.115
SD	3.75336	3.82466	3.83094		4.93833	4.00806	5.26747		210.563	146.292	183.063
n	32	32	33		32	32	33		32	32	33
SEM	0.663506	0.676111	0.666882		0.872982	0.708531	0.916948		37.2226	25.861	31.8672
