# Supplementary material for: Functional interdependence of the actin nucleator Cobl and Cobl-like in dendritic arbor development
Source: eLife. 2021 Jul 15;10:e67718. doi: 10.7554/eLife.67718 (PMC8282341; doi:10.7554/eLife.67718)
Supplement: Figure 3—source data 2. [file elife-67718-fig3-data2.xlsx]

## Sheet: Figure 3-source data 2
	Figure 3G
Sholl intersections	GFP+Scr. RNAi			GFP-Cobl-like + Scr. RNAi			GFP-Cobl-like + SdpI RNAi
	Mean	SEM	n	Mean	SEM	n	Mean	SEM	n
10	11.44	0.54	32	14.22	0.65	32	11.73	0.67	33
15	13.34	0.68	32	17.84	0.89	32	13.64	0.74	33
20	13.06	0.9	32	17.44	0.85	32	11.73	0.86	33
25	10	0.98	32	14.03	0.76	32	9.52	0.8	33
30	7.72	0.88	32	9.63	0.71	32	7	0.69	33
35	5.91	0.72	32	6.47	0.65	32	5.15	0.61	33
40	4.31	0.67	32	4.5	0.49	32	4.18	0.58	33
45	3.53	0.57	32	3	0.37	32	3.18	0.44	33
50	2.53	0.43	32	1.94	0.28	32	2.39	0.3	33
55	2	0.29	32	1.41	0.23	32	2.06	0.26	33
60	1.59	0.29	32	1.09	0.21	32	1.48	0.22	33
65	1.31	0.22	32	0.72	0.14	32	1.09	0.2	33
70	1.13	0.2	32	0.53	0.13	32	0.88	0.17	33
