# Supplementary material for: Functional interdependence of the actin nucleator Cobl and Cobl-like in dendritic arbor development
Source: eLife. 2021 Jul 15;10:e67718. doi: 10.7554/eLife.67718 (PMC8282341; doi:10.7554/eLife.67718)
Supplement: Figure 5—source data 1. [file elife-67718-fig5-data1.xlsx]

## Sheet: Figure 5-source data
	Figure 5C							Figure 5D
	SdpI	Coblelike	Cobl	CaM	Ctrl			SdpI	Coblelike	Cobl	CaM
	141.2	94.1	161.5	71.4	15.5			-20	-50	-40	-30
	41.7	112.5	47.1	107.7	3.2			-60	-60	-30	-50
	41.7	81.3	121.4	63	0			-40	-10	-40	-30
	28.6	107.7	71.4	16.7	1.9			-40	-35	-30	-60
	56.5	85.7	200	83.3	10.2			-50	-10	-20	-40
	285	360	95.2	83.3	34.6			-40	-60	-10	-10
	94.1	73.3	97.9	35	0			-60	-10	-60	-50
	243.8	208.3	19.4	47.1	0			-10	-20	-10	-60
	73.3	56.5	34.8	47.1	0			-40	-50	-30	-20
	42.1	65	31.6	90.9	8.8			-40	-20	-20	-60
	114.3	58.8	111.1	40	19.4			-60	-10	-40	-10
	46.7	15	65	193.8	37.3			-50	-40	-35	-30
	71.4	27.3	38.9	72.7	37.3			-35	-60	-30	-20
	108.3	34.6	100	50	20			-25	-35	-40	-60
	60	9.1	81.3	63.6	9.3			-20	-60	-10	-10
	120	73.3	134.6	18.6	9.1			-10	-15	-10	-20
	81	33.3	56.6	58.8	9.1			-10	-10	-60	-20
	184.6	81.8	158.3	266.7	10.1			-40	-10	-50	-10
	52.6	27.3	33.3	3.7				-10	-60	-20	-50
	260	35.3	73.3	3.7				-60	-40	-30	-20
	53.6	60	70	114.3				-15	-10	-10	-10
Mean	104.786	80.9619	85.8429	72.9238	12.5444			-35	-32.1429	-29.7619	-31.9048
SD	76.6349	77.3512	48.5147	61.6786	12.6334			18.097	20.831	15.6905	19.1361
n	21	21	21	21	18			21	21	21	21
SEM	16.7231	16.8794	10.5868	13.4594	2.97773			3.94908	4.54569	3.42394	4.17584
