# Supplementary material for: Functional interdependence of the actin nucleator Cobl and Cobl-like in dendritic arbor development
Source: eLife. 2021 Jul 15;10:e67718. doi: 10.7554/eLife.67718 (PMC8282341; doi:10.7554/eLife.67718)
Supplement: Figure 6—source data 1. [file elife-67718-fig6-data1.xlsx]

## Sheet: Figure 6-source data
Figure 6B											Figure 6C										Figure 6D
																					density of anti-SdpI clusters (>=3 labels) in labels per µm2
image	Sdp1 labels in dendritic protrusion	area of dendritic protrusion [sqµm]	Sdp1 cluster in dendritic protrusion	Sdp1 in normal dendrite (cylindrical)	area of normal dendrite [sqµm]	Sdp1 cluster in normal dendrite (cylindrical)	Sdp1/sqµm in dendritic protrusion areas	Sdp1/sqµm in normal dendrite (clyindrical)				protrusive	normal		protrusive	normal	in percent of total				Protrusive	Cylindrical
223_(1)_...02	9	4.97	1;1;7	6	2.48	2;2;2	1.81087	2.41935			1 bis 2	146	92		43.5821	71.3178					0.201207	0
223_(1)_...04	8	2.92	1;1;2;4	6	3.31	1;5	2.73973	1.81269			3 bis 5	129	30		38.5075	23.2558					0.342466	0.302115
223_(1)_...06	15	4.37	2;2;5;6	0	1.244	0	3.43249	0			6 und mehr	60	7		15.5224	5.42636					0.457666	0
223_(1)_...10	14	1.73	1;2;3;3;5	18	3.53	1;1;2;2;3;4;5	8.09249	5.09915													1.7341	0.849858
223_(1)_...12	5	1.52	5;	0	1.35	0	3.28947	0			cluster/total			relativ	protrusive	normal	in percent of total				0.657895	0
223_(1)_...14	4	2.48	1;1;2	1	1.14	1	1.6129	0.877193			1	48	40		14.3284	31.0078					0	0
223_(1)_...26	12	0.91	1;2;2;3;4	2	0.44	1;1	13.1868	4.54545			2	98	52		29.2537	40.3101					2.1978	0
223_(1)_...32	12	0.98	2;2;2;3;3	4	0.19	1;1;2	12.2449	21.0526			3	63	12		18.806	9.30233					2.04082	0
223_(1)_...36	6	0.37	1;1;1;3	7	1.13	7	16.2162	6.19469			4	36	8		10.7463	6.20155					2.7027	0.884956
223_(3)_...06	10	0.9	1;1;1;7	4	0.28	2;2	11.1111	14.2857			5	30	10		8.95522	7.75194					1.11111	0
223_(3)_...10	6	0.46	1;2;3	2	0.45	2	13.0435	4.44444			6	24	0		7.16418	0					2.17391	0
223_(3)_...18	2	0.48	2;	1	0.5		4.16667	2			7	28	7		8.35821	5.42636					0	0
223_(4)_...15	4	0.88	2;3	0	0.43	0	4.54545	0			8	8	0		2.38806	0					1.13636	0
223_(4)_...21	8	1.06	4;4	3	0.65	1;2	7.54717	4.61538			sum			Sum	100	100	percent				1.88679	0
224_(1)_...04	10	0.28	1;3;6	0	0.36	0	35.7143	0													7.14286	0
224_(1)_...06	8	0.36	1;2;2;3	0	0.4	0	22.2222	0													2.77778	0
224_(1)_...09	5	0.24	2;3	2	0.48	1;1	20.8333	4.16667													4.16667	0
224_(1)_...10	5	0.18	2;3	1	0.4	1	27.7778	2.5													5.55556	0
223_(5)_...03	11	0.95	1;1;1;2;2;2	0	0.48	0	11.5789	0													0	0
223_(5)_...07	9	0.75	1;1,2;2;3	2	0.32	2	12	6.25													1.33333	0
223_(5)_...09	6	0.27	2;4	6	0.32	1;1;1;3	22.2222	18.75													3.7037	3.125
223_(5)_...11	13	0.77	1;1;2;2;7	0	0.42	0	16.8831	0													1.2987	0
223_(5)_...15	6	0.52	1;5	0	0.22	0	11.5385	0													1.92308	0
2.Assay
291_(1)_...02	10	0.67	1;1;1;1;2;2;2	5	0.62	1;2;2	14.9254	8.06452													0	0
291_(1)_...04	5	0.24	2;3	1	0.3	1	20.8333	3.33333													4.16667	0
291_(1)_...08	13	1.15	1;2;2;2;3;3	3	0.76	1;2	11.3043	3.94737													1.73913	0
291_(1)_...10	13	1.05	1;1;1;1;1;2;2;4	3	0.57	1;2	12.381	5.26316													0.952381	0
291_(1)_...12	18	1.07	1;1;1;2;2;2;3;3;3	1	0.35	1	16.8224	2.85714													2.80374	0
291_(1)_...14	28	1.95	1;1;1;1;2;3;4;4;6;6	3	0.41	1;2	14.359	7.31707													2.5641	0
291_(1)_...18	11	1.03	2;4;5	1	0.08	1	10.6796	12.5													1.94175	0
291_(1)_...22	18	1.07	1;1;1;1;1;2;2;2;7	1	0.08	1	16.8224	12.5													0.934579	0
291_(1)_...27	6	0.67	1;2;3	0	0.08	0	8.95522	0													1.49254	0
291_(2)_...02	16	0.54	2;2;2;2;8	0	0.08	0	29.6296	0													1.85185	0
223_(6)_...03				5	0.81	1;1;1;2		6.17284														0
223_(6)_...06	9	0.29	2;2;5	0	0.43	0	31.0345	0													3.44828	0
223_(6)_...08				2	0.85	1;1		2.35294														0
223_(6)_...12				6	0.95	1;2;3		6.31579														1.05263
223_(6)_...14				8	1.36	1;2;2;3		5.88235														0.735294
223_(6)_...16				4	1.07	1;1;2		3.73832														0
223_(6)_...18				9	1.11	1;1;1;1;1;4		8.10811														0.900901
291_(2)_...02(2)				13	0.85	1;1;1;2;2;2;2;2		15.2941														0
Sum label in total	335			130		Mittelwerte	13.8693	4.94294												Mean	1.9541	0.191482
						SD	1.59852	8.61123												SD	1.73613	0.609251
						n	34	41												n	34	41
						SEM	0.274144	1.34485												SEM	0.297745	0.095149
