# Supplementary material for: Functional interdependence of the actin nucleator Cobl and Cobl-like in dendritic arbor development
Source: eLife. 2021 Jul 15;10:e67718. doi: 10.7554/eLife.67718 (PMC8282341; doi:10.7554/eLife.67718)
Supplement: Figure 7—source data 1. [file elife-67718-fig7-data1.xlsx]

## Sheet: Figure 7-source data
	Figure 7E
					Ca
					79.6201
					74.8249
					57.3121
				Mean	70.5857
				SD	11.7426
				n	3
				SEM	6.7796
