# Supplementary material for: Functional interdependence of the actin nucleator Cobl and Cobl-like in dendritic arbor development
Source: eLife. 2021 Jul 15;10:e67718. doi: 10.7554/eLife.67718 (PMC8282341; doi:10.7554/eLife.67718)
Supplement: Figure 8—source data 1. [file elife-67718-fig8-data1.xlsx]

## Sheet: Figure 8-source data
	Figure 8D					Figure 8E					Figure 8F
	Scr. RNAi/GFP	Cobllike-RNAi/GFP	Cobllike RNAi/GFP-Cobl-like*	Cobllike RNAi/GFP-Cobl-like*DCaM NT		Scr. RNAi/GFP	Cobllike-RNAi/GFP	Cobllike RNAi/GFP-Cobl-like*	Cobllike RNAi/GFP-Cobl-like*DCaM NT		Scr. RNAi/GFP	Cobllike-RNAi/GFP	Cobllike RNAi/GFP-Cobl-like*	Cobllike RNAi/GFP-Cobl-like*DCaM NT
	12	10	9	3		23	25	20	10		509	577.41	447.68	566.14
	9	12	18	11		22	25	30	21		521	771.29	625.5	704.59
	10	5	10	11		20	18	20	17		472	530.35	430.55	639.68
	7	2	5	6		17	6	15	13		451	274.91	463.98	572.6
	9	10	14	5		21	24	25	11		465	610.79	600.52	435.84
	9	8	12	9		22	20	24	16		532	602.03	839.75	606.7
	7	7	17	5		17	16	26	13		439	704.46	540.66	485.87
	14	8	16	14		23	19	28	24		502	663.46	645.23	677.34
	13	2	11	11		20	11	26	22		537	424.57	608.77	666.96
	13	11	13	4		22	19	25	11		625	589.73	693.63	515.31
	14	5	18	8		24	19	31	15		643	541.21	807.39	523.15
	10	9	14	6		20	15	28	15		698	447.85	787.72	448.92
	8	7	13	17		15	17	24	30		415.01	664.51	487.56	1060.21
	14	5	13	4		23	14	26	10		750.31	383.7	966.66	520.61
	15	3	10	7		30	10	19	21		912.32	332.16	720.23	938.08
	5	5	13	4		14	11	20	15		614.09	505.5	682.82	424.72
	11	5	15	3		18	13	26	14		538.66	476.11	839.16	632.22
	10	4	10	5		22	20	22	14		883.93	921.85	914.25	413.52
	13	5	9	3		26	16	18	13		930.58	698.14	674.89	546.31
	7	10	12	5		16	25	22	13		569.86	643.92	729.16	338.29
	8	10	8	8		16	19	15	15		463.14	485.78	588.78	390.13
	12	6	10	13		21	16	20	22		725.22	487.5	605.25	609.66
	12	10	10	14		23	26	21	18		1096.54	750.76	649.2	609.23
	10	8	14	0		21	19	27	5		833.63	564.95	861.17	243.06
	7	2	10	10		22	7	22	22		824.66	176.68	685.4	778.08
	7	3	12	14		16	17	24	24		529.76	411.7	936.07	592.47
	10	6	10	8		18	12	21	16		767.14	331.14	640.39	488.55
	15	4	14	5		22	16	27	12		952.13	470.88	1073.83	472.77
	12	5	20	5		19	15	29	15		867.05	502.87	912.67	564
	5	8	2	8		13	19	14	19		458.46	622.47	628.72	507.82
	8	2	14	1		17	7	20	6		699.9	174.32	639.39	289.11
	14	9	9	16		19	19	21	24		891.9	572.79	888.21	765.72
	5	4	6	7		17	11	15	16		587.92	411.51	323.06	575.55
	10	4	11	5		16	11	18	17		573.73	376.46	705.52	653.55
	9		8	5		17		15	13		732.26		556.85	478.4
	11		13	5		20		27	17		558.99		928.6	579.15
	16		14	3		28		20	11		849.56		626.09	477.08
			6	7				15	15				409.98	420.72
			15	15				21	22				539.88	730.89
				12					18					557.04
Mean	10.2973	6.29412	11.7436	7.55		20	16.3824	22.2308	16.125		660.02	520.699	684.748	562.501
SD	3.01722	2.90798	3.73967	4.29639		3.75648	5.31444	4.61953	5.17483		179.124	164.398	172.152	157.357
n	37	34	39	40		37	34	39	40		37	34	39	40
SEM	0.496028	0.498714	0.598827	0.679319		0.617561	0.91142	0.739717	0.818212		29.4478	28.1941	27.5664	24.8803
