# Supplementary material for: Functional interdependence of the actin nucleator Cobl and Cobl-like in dendritic arbor development
Source: eLife. 2021 Jul 15;10:e67718. doi: 10.7554/eLife.67718 (PMC8282341; doi:10.7554/eLife.67718)
Supplement: Figure 8—source data 2. [file elife-67718-fig8-data2.xlsx]

## Sheet: Figure 8-source data 2
	Figure 8G
Sholl intersections	Scr. RNAi/GFP			Cobllike-RNAi/GFP			Cobllike RNAi/GFP-Cobl-like*			Cobllike RNAi/GFP-Cobl-like*DCaM NT
	Mean	SEM	n	Mean	SEM	n	Mean	SEM	n	Mean	SEM	n
10	11.05	0.53	37	9.85	0.77	34	12.05	0.5	39	9.48	0.41	40
15	14.03	0.69	37	11.24	1.05	34	15.54	0.72	39	11.65	0.59	40
20	13.89	0.67	37	10.79	1.06	34	15.85	0.62	39	12.55	0.67	40
25	12.14	0.67	37	8.48	0.86	34	13.28	0.7	39	10.68	0.62	40
30	9.46	0.69	37	6.48	0.75	34	10.95	0.73	39	8.5	0.58	40
35	7.51	0.69	37	4.52	0.63	34	8.31	0.69	39	6.68	0.51	40
40	6.32	0.63	37	3.42	0.51	34	6.74	0.63	39	5.18	0.43	40
45	5.03	0.52	37	2.73	0.45	34	5.05	0.48	39	4.28	0.35	40
50	4.46	0.49	37	2.15	0.4	34	3.92	0.44	39	3.35	0.36	40
55	3.68	0.46	37	1.85	0.34	34	3.28	0.43	39	2.8	0.27	40
60	2.78	0.4	37	1.3	0.25	34	2.87	0.48	39	2.35	0.24	40
65	2.24	0.37	37	0.85	0.2	34	2.15	0.47	39	1.95	0.25	40
70	1.73	0.33	37	0.61	0.17	34	1.69	0.46	39	1.4	0.17	40
75	1.32	0.24	37	0.36	0.11	34	1.46	0.49	39	1.15	0.15	40
80	1.14	0.27	37	0.27	0.11	34	1.28	0.44	39	0.83	0.12	40
85	0.81	0.24	37	0.18	0.08	34	0.95	0.41	39	0.63	0.11	40
