# Supplementary material for: Functional interdependence of the actin nucleator Cobl and Cobl-like in dendritic arbor development
Source: eLife. 2021 Jul 15;10:e67718. doi: 10.7554/eLife.67718 (PMC8282341; doi:10.7554/eLife.67718)
Supplement: Figure 9—source data 1. [file elife-67718-fig9-data1.xlsx]

## Sheet: Figure 9-source data 1
	Figure 10D
	GFP-Cobl like1-457	GFP-Cobl like1-457DKRAP1
	40	15
	69	-29
	37	-27
		13
Mean	48.6667	-7
SD	17.673	24.2762
n	3	4
SEM	10.2035	12.1381
