# Supplementary material for: Functional interdependence of the actin nucleator Cobl and Cobl-like in dendritic arbor development
Source: eLife. 2021 Jul 15;10:e67718. doi: 10.7554/eLife.67718 (PMC8282341; doi:10.7554/eLife.67718)
Supplement: Figure 9—source data 2. [file elife-67718-fig9-data2.xlsx]

## Sheet: Figure 9-source data 2
	Figure 10F
	GFP-Cobl like1-457DKRAP1
	1.86
	14
Mean	7.93
SD	8.58428
n	2
SEM	6.07
