# Supplementary material for: Functional interdependence of the actin nucleator Cobl and Cobl-like in dendritic arbor development
Source: eLife. 2021 Jul 15;10:e67718. doi: 10.7554/eLife.67718 (PMC8282341; doi:10.7554/eLife.67718)
Supplement: Figure 9—source data 3. [file elife-67718-fig9-data3.xlsx]

## Sheet: Figure 9-source data 3
	Figure 9I
	Cobl-like RNAi/GFP-Cobl-like*	Cobl-like RNAi/GFP-Cobl-like*DKRAP1
	1.86	1.61
	1.82	1.22
	2.3	1.2
	3.06	1.21
	2.72	1.6
	1.72	1.7
	2.55	1.16
	2.84	1.97
	2.38	1.28
	2.53	1.16
	2.34	1.33
	2.41	1.26
	2.67	1.12
	2.11	1.19
	2.43	1.28
	1.74	0.89
	2.21	1.37
	2.23	1.16
	1.9	1.45
	2.15	1.41
	2.14	1.83
	1.61	2.74
	1.91	1.88
	1.7	3.51
	1.77	1.54
	1.93	1.45
	2.08	1.24
	2.15	0.86
	2.02	1.23
	2.02	2.54
	1.66	1.11
		1.23
		1.637
		1.721
Mean	2.16	1.50259
SD	0.369766	0.535551
n	31	34
SEM	0.0664119	0.0918462
