# Supplementary material for: Functional interdependence of the actin nucleator Cobl and Cobl-like in dendritic arbor development
Source: eLife. 2021 Jul 15;10:e67718. doi: 10.7554/eLife.67718 (PMC8282341; doi:10.7554/eLife.67718)
Supplement: Figure 9—source data 4. [file elife-67718-fig9-data4.xlsx]

## Sheet: Figure 9-source data 4
	Figure 9J						Figure 9K						Figure 9L
	Scr. RNAi/ GFP	Cobllike-RNAi/ GFP	Cobllike-RNAi/ GFP-Cobl-like*	Cobllike-RNAi/ GFP-Cobl-like*D1-412	Cobllike-RNAi/ GFP-Cobl-like*DKRAP1		Scr. RNAi/ GFP	Cobllike-RNAi/ GFP	Cobllike-RNAi/ GFP-Cobl-like*	Cobllike-RNAi/ GFP-Cobl-like*D1-412	Cobllike-RNAi/ GFP-Cobl-like*DKRAP1		Scr. RNAi/ GFP	Cobllike-RNAi/ GFP	Cobllike-RNAi/ GFP-Cobl-like*	Cobllike-RNAi/ GFP-Cobl-like*D1-412	Cobllike-RNAi/ GFP-Cobl-like*DKRAP1
	12	10	9	10	5		23	25	20	16	16		509	577.41	447.68	342	488
	9	12	18	4	5		22	25	30	10	17		521	771.29	625.5	327	573
	10	5	10	7	8		20	18	20	17	25		472	530.35	430.55	492	625
	7	5	5	5	6		17	10	15	17	13		451	405.2	463.98	321	334
	9	10	14	0	9		21	24	25	12	17		465	610.79	600.52	345	551
	9	8	12	5	10		22	20	24	17	20		532	602.03	839.75	502	684
	7	7	17	9	4		17	16	26	19	17		439	704.46	540.66	514	453
	14	8	16	3	2		23	19	28	14	16		502	663.46	645.23	349	434
	13	2	11	5	7		20	11	26	17	16		537	424.57	608.77	508	401
	13	11	13	5	7		22	19	25	14	15		625	589.73	693.63	540	560
	14	5	18	10	3		24	19	31	16	15		643	541.21	807.39	494	435
	10	9	14	7	5		20	15	28	17	17		698	447.85	787.72	462	560
	8	7	13	4	6		15	17	24	16	13		415.01	664.51	487.56	437.65	664.73
	14	5	13	7	14		23	14	26	20	29		750.31	383.7	966.66	704.29	889.37
	15	3	10	9	5		30	10	19	23	10		912.32	332.16	720.23	739.67	429.36
	5	8	13	13	7		14	15	20	21	19		614.09	421.53	682.82	732.26	556.16
	11	7	15	8	4		18	22	26	23	10		538.66	737.41	839.16	706.83	300.82
	10	5	10	5	7		22	11	22	19	20		883.93	505.5	914.25	834.93	607.05
	13	5	9	14	7		26	13	18	25	21		930.58	476.11	674.89	776.12	690.47
	7	4	12	11	9		16	20	22	22	23		569.86	921.85	729.16	940.24	674.96
	8	5	8	8	7		16	16	15	24	20		463.14	698.14	588.78	969.12	662.18
	12	10	10	12	7		21	25	20	24	12		725.22	643.92	605.25	767.1	447.87
	12	10	10	1	13		23	19	21	11	22		1096.54	485.78	649.2	590.98	813.67
	10	6	14	5	9		21	16	27	17	17		833.63	487.5	861.17	688.97	818.25
	7	10	10	11	6		22	26	22	30	11		824.66	750.76	685.4	744.29	498.62
	8	8	12	6	3		21	19	24	16	10		671.33	564.95	936.07	501.33	419.15
	13	2	10	9	8		23	7	21	20	15		884.96	176.68	640.39	646.69	360.61
	8	3	14	7	1		17	17	27	12	14		608.64	411.7	1073.83	423.83	453.32
	9	6	20	4	13		18	12	29	19	26		648.5	331.14	912.67	640.99	662.65
	7	4	2	5	3		16	16	14	10	9		529.76	470.88	628.72	337.51	415.45
	10	5	14	7	7		18	15	20	15	15		767.14	502.87	639.39	452.4	570.37
	15	8	9	6	2		22	19	21	15	8		952.13	622.47	888.21	565.98	409.32
	12	2	6	5	12		19	7	15	12	20		867.05	174.32	323.06	326.24	665.81
	5	9	11	3	12		13	19	18	10	23		458.46	572.79	705.52	465.48	697.72
	8	4	8	8	10		17	11	15	22	18		699.9	411.51	556.85	790.04	645.7
	14	4	13	9	10		19	11	27	20	15		891.9	376.46	928.6	547.12	515.69
	5	9	14	5	6		17	20	20	15	11		587.92	667.33	626.09	521.52	498.62
	10		6	13	10		16		15	20	14		573.73		409.98	602.02	409.39
	9		15	9	14		17		21	19	23		732.26		539.88	482.91	658.91
	11		15	8	4		20		24	17	14		558.99		950.72	520.64	588.55
	16		12	7			28		19	15			849.56		814.71	407.73
Mean	10.2195	6.51351	11.8293	7.04878	7.175		19.9756	16.7027	22.1951	17.5122	16.65		664.248	531.36	694.405	562.46	553.069
SD	2.94544	2.74491	3.68037	3.16979	3.39598		3.6434	5.02143	4.53993	4.48955	4.92274		173.77	159.766	173.924	171.199	137.575
n	41	37	41	41	40		41	37	41	41	40		41	37	41	41	40
SEM	0.46	0.451261	0.574777	0.495038	0.536952		0.569004	0.825517	0.709018	0.701151	0.778353		27.1383	26.2654	27.1624	26.7368	21.7524
